# Supplementary material for: Origin of the half-metallic properties of graphitic carbon nitride in bulk and confined forms
Source: Royal Society of Chemistry journal article supplement (doi:10.1039/c3tc30371c), 2013-01-01
Supplement: c3tc30371c.pdf [file c3tc30371c.pdf]

## Origin of the half-metallic properties of graphitic carbon nitride in bulk and confined form

Yang Li<sup>1</sup>, Stefano Sanvito<sup>2</sup>, Shimin Hou<sup>1,\*</sup>

<sup>1</sup> Centre for Nanoscale Science and Technology, Key Laboratory for the Physics and Chemistry of Nanodevices, Department of Electronics, Peking University, Beijing 100871, China

<sup>2</sup> School of Physics and CRANN, Trinity College, Dublin 2, Ireland

### 1. Frontier molecular orbitals of the isolated sym-triazine and benzene molecules

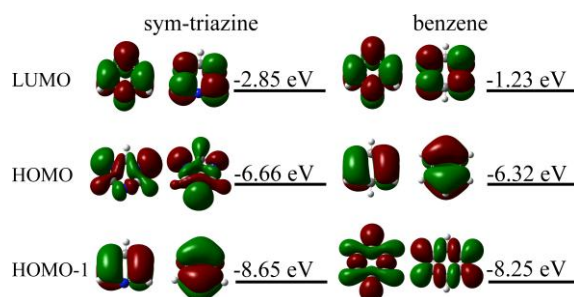

Figure S1 Comparison of the frontier molecular orbitals of the isolated sym-triazine and benzene molecules calculated at the PBE/PBE/6-311+G(d,p)

### 2. Optimized atomic structures and the corresponding spin-resolved band structures of zigzag g-C<sub>4</sub>N<sub>3</sub> nanoribbons passivated with methyl groups

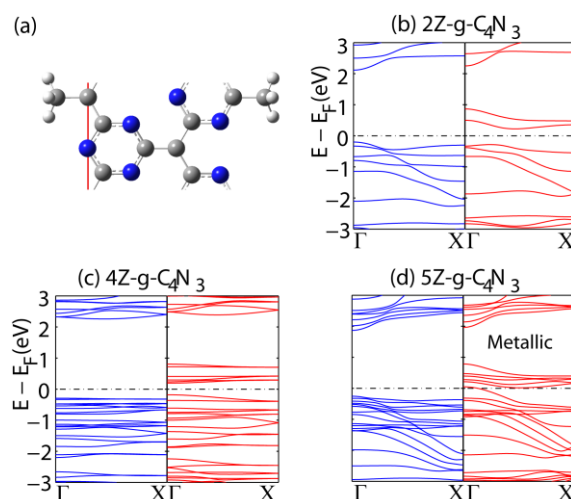

Figure S2 (a) The optimized atomic structure of the 2Z-g-C<sub>4</sub>N<sub>3</sub> nanoribbon passivated with methyl groups, and the corresponding spin-polarized band structures of the 2Z-g-C<sub>4</sub>N<sub>3</sub> (b), 4Z-g-C<sub>4</sub>N<sub>3</sub> (c) and 5Z-g-C<sub>4</sub>N<sub>3</sub> (d) nanoribbons

3. Optimized atomic structures and the corresponding spin-resolved band structures of armchair g-C<sub>4</sub>N<sub>3</sub> nanoribbons passivated with methyl groups

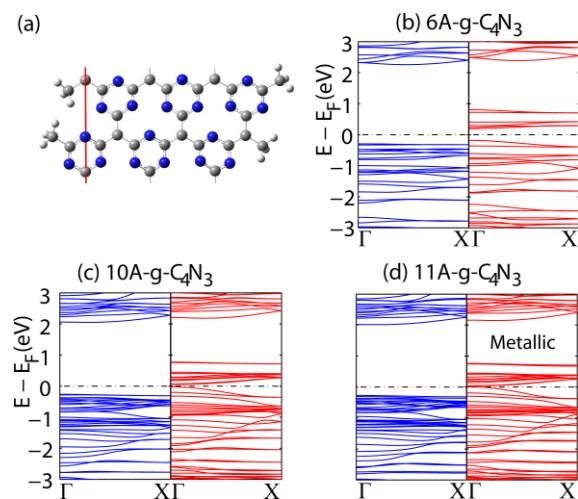

Figure S3 (a) The optimized atomic structure of the 6A-g-C<sub>4</sub>N<sub>3</sub> nanoribbon passivated with methyl groups, and the corresponding spin-polarized band structures of the 6A-g-C<sub>4</sub>N<sub>3</sub> (b), 10A-g-C<sub>4</sub>N<sub>3</sub> (c) and 11A-g-C<sub>4</sub>N<sub>3</sub> (d) nanoribbons
